# Supplementary material for: Role of MiR-325-3p in the Regulation of CFL2 and Myogenic Differentiation of C2C12 Myoblasts
Source: Cells. 2021 Oct 12;10(10):2725. doi: 10.3390/cells10102725 (PMC8534702; doi:10.3390/cells10102725)
Supplement: Supplementary file 1 [file cells-10-02725-s001.zip › cells-1365395-supplementary.pdf]

## Article

# Role of MiR-325-3p in the Regulation of CFL2 and Myogenic Differentiation of C2C12 Myoblasts

Mai Thi Nguyen <sup>1</sup> and Wan Lee <sup>1,2,\*</sup>

<sup>1</sup> Department of Biochemistry, Dongguk University College of Medicine, 123 Dongdae-ro, Gyeongju 38066, Korea; nguyenmainhp@gmail.com

<sup>2</sup> Channelopathy Research Center, Dongguk University College of Medicine, 32 Dongguk-ro, Ilsan Dong-gu, Goyang 10326, Korea

\* Correspondence: wanlee@dongguk.ac.kr; Tel.: +82-54-770-2409

## Supplementary Data: Analysis of miR-325-3p expression using an Affymetrix GeneChip miRNA 4.0 array

### 1. PA treatment, RNA extraction, and quality check

A fatty acid-free bovine serum albumin (BSA, Bovogen, VIC, Australia)-conjugated PA (Sigma-Aldrich) solution was prepared. Briefly, BSA and sodium PA were entirely dissolved in 150 mM NaCl by heating at 37°C and 70°C, respectively. The BSA solution was added dropwise to the PA solution at 37°C with continuous stirring until the PA to BSA molar ratio was 6:1. The BSA-conjugated PA and BSA vehicles were aliquoted and stored at -80°C. C2C12 cells were seeded on 6-well plates (Thermo Fisher Scientific) at a density of  $1.3 \times 10^5$  cells/well in 2 ml of GM. After 24 h, they were treated with BSA-conjugated PA (100  $\mu$ M) for 24 h as described previously [1]. The control cells were treated with the BSA vehicle. The total RNA from the C2C12 cells was extracted using a miRNeasy Mini Kit (Qiagen) according to the manufacturer's instructions. The purity and integrity of the RNA were assessed using an ND-1000 Spectrophotometer (NanoDrop) and Agilent 2100 Bioanalyzer (Agilent Technologies). Equal amounts of RNA from three independent experiments were pooled together and used for the microarray.

### 2. miRNA arrays analysis

The total RNA described above was prepared and subjected to an Affymetrix GeneChip miRNA 4.0 array (Affymetrix, Santa Clara, CA, USA) process according to the Affymetrix technical instructions. Briefly, 600ng RNA was labeled with a FlashTag™ Biotin RNA Labeling Kit (Genisphere, Hatfield, PA, USA). The labeled RNA was quantified, fractionated, and hybridized to the miRNA microarray according to the manufacturer's instructions. The labeled RNA was heated to 99°C for 5 min and incubated at 45°C for 5 min. RNA-array hybridization was conducted with agitation at 60 rpm for 16 hrs at 48°C on an Affymetrix® 450 Fluidics Station. The chips were stained on a GeneChip Fluidics Station 450 (Affymetrix) and scanned using an Affymetrix GCS 3000 scanner (Affymetrix).

According to the quantile method after a log<sub>2</sub> transformation, all signals were normalized to make them comparable across microarrays.

### 3. Expression level of miR-325-3p.

| ProbeID  | Transcript | Palmitate_0.1 mM/Palmitate_0 mM. fold change | Palmitate_0.1mM/Palmitate_0mM. volume | N_Palmitate_0mM | N_Palmitate_0.1mM | 160712_1_Palmitate_0mM_(miRNA-4_0).rma-dabg-Signal | 160712_2_Palmitate_0.1mM_(miRNA-4_0).rma-dabg-Signal | 160712_1_Palmitate_0mM_(miRNA-4_0).rma-dabg-Detection | 160712_2_Palmitate_0.1mM_(miRNA-4_0).rma-dabg-Detection | fail.count | GeneChip Array |
|----------|------------|----------------------------------------------|---------------------------------------|-----------------|-------------------|----------------------------------------------------|------------------------------------------------------|-------------------------------------------------------|---------------------------------------------------------|------------|----------------|
| 20501311 | miR-325    | 2.20105                                      | 1.4429149                             | 0.9819918       | 2.120184          | 0.9819918                                          | 2.120184                                             | P                                                     | P                                                       | 0          | miRNA-4_0      |

### Reference

[1] M.T. Nguyen, K.H. Min, W. Lee, MiR-96-5p Induced by Palmitic Acid Suppresses the Myogenic Differentiation of C2C12 Myoblasts by Targeting FHL1, Int J Mol Sci, 21 (2020).

**Table S1. Oligonucleotide sequences for transfection**

| Gene                | Primer sequence (5'-3')  |
|---------------------|--------------------------|
| scRNA (control RNA) | UCACAACCUCCUAGAAAGAGUAGA |
| siCFL2              | GCUCUAAAGAUGCCAUAUU      |
| miR-325-3p          | AAAAGCUGGGUUGAGAGGGCGA   |
| antimiR-325         | Genolution               |

**Table S2. Primer lists and conditions for *q*RT-PCR, RT-PCR and cloning**(A) Mouse primer lists for *q*RT-PCR and RT-PCR

| Gene                   | Primer sequence (5'-3') |                                    | Product size | Annealing Temperature | Concentration |        | Cycle |
|------------------------|-------------------------|------------------------------------|--------------|-----------------------|---------------|--------|-------|
|                        |                         |                                    |              |                       | cDNA          | Primer |       |
| miR-325-3p             | F.P                     | CCTAGTAGGTGTCCAGTAAGTGT            | 90           | 55                    | 2 ng/μl       | 0.5 μM | 40    |
| miRNA universal Primer | R.P                     | miScript universal primer (Qiagen) |              |                       |               |        |       |
| U6                     | F.P                     | CTCGCTTCGGCAGCACA                  | 94           |                       |               |        |       |
|                        | R.P                     | AACGCTTCACGAATTTGCGT               |              |                       |               |        |       |
| β-Actin                | F.P                     | TCACCCACACTGTGCCATCTACGA           | 348          | 58                    |               |        |       |
|                        | R.P                     | GGATGCCACAGGATTCCATACCCA           |              |                       |               |        |       |
| CFL2                   | F.P                     | CCGACCCCTCCTTCTTCTCG               | 100          | 58                    |               |        |       |
|                        | R.P                     | GTAACTCCAGATGCCATAGTG              |              |                       |               |        |       |
| CCND1                  | F.P                     | ACCAATCTCCTCAACGACCG               | 228          | 58                    |               |        |       |
|                        | R.P                     | ACGGAAGGGAAGAGAAGGG                |              |                       |               |        |       |
| PCNA                   | F.P                     | GAACCTGCAGAGCATGGACTC              | 201          | 58                    |               |        |       |
|                        | R.P                     | GGTGTCTGCATTATCTTCAGCCC            |              |                       |               |        |       |

(B) Primer lists for wild-type and mutant 3'UTR cloning

| Gene                | Primer sequence (5′-3′) |                           | Product size | Annealing Temperature | Concentration |        | Cycle |
|---------------------|-------------------------|---------------------------|--------------|-----------------------|---------------|--------|-------|
|                     |                         |                           |              |                       | cDNA          | Primer |       |
| CFL2 <sub>wt</sub>  | F.P                     | CATTCCTGTTACCTGCATATCTTCT | 358          | 58                    | 2 ng/μl       | 0.5 μM | 35    |
|                     | R.P                     | TCTCTGCACTGGTCATTTGA      |              |                       |               |        |       |
| CFL2 <sub>mut</sub> | F.P                     | CGTTGCAGATAAAATTGTGGCAT   | 128          |                       |               |        |       |
|                     | R.P                     | TCTCTGCACTGGTCATTTGA      |              |                       |               |        |       |
|                     | F.P                     | CATTCCTGTTACCTGCATATCTTCT | 253          |                       |               |        |       |
|                     | R.P                     | ATGCCACAATTTTATCTGCAACG   |              |                       |               |        |       |

Table S3. Antibodies list

| Antibody                              | Type       | Targeted species | Manufacturer                                         | Cat. No.   | Dilution ratio* |
|---------------------------------------|------------|------------------|------------------------------------------------------|------------|-----------------|
| CFL2                                  | Polyclonal | Rabbit           | Lifespan Biosciences, Seattle, WA, USA               | LS-C409553 | 1:2,000         |
| MyHC                                  | Monoclonal | Mouse            | DSHB, Iowa, IA, USA                                  | MF20       | 1:1,000         |
| MyoD                                  | Monoclonal | Mouse            | Santa Cruz Biotechnology, Dallas, TX, USA            | sc-377460  | 1:1,000         |
| MyoG                                  | Monoclonal | Mouse            | Santa Cruz Biotechnology, Dallas, TX, USA            | sc-12732   | 1:1,000         |
| YAP                                   | Monoclonal | Rabbit           | Cell Signaling Technology, Danvers, MA, USA          | 14074S     | 1:10,000        |
| pYAP                                  | Polyclonal | Rabbit           | Cell Signaling Technology, Danvers, MA, USA          | 4911S      | 1:10,000        |
| YY1                                   | Polyclonal | Rabbit           | Santa Cruz Biotechnology, Dallas, TX, USA            | sc-1703    | 1:5,000         |
| α-Tubulin                             | Monoclonal | Mouse            | DSHB, Iowa, IA, USA                                  | 12G10      | 1:2,000         |
| β-actin                               | Monoclonal | Rabbit           | Sigma-Aldrich Chemical, St. Louis, USA               | A2066      | 1:10,000        |
| Antibodies HRP-linked anti-rabbit IgG |            |                  | Cell Signaling Technology, Danvers, MA, USA          | #7074      | 1:10,000        |
| Goat anti-mouse(H+L)                  |            |                  | Invitrogen, Thermofisher Scientific, Waltham, MA USA | #32430     | 1:2,000         |

\*All blots were visualized using a Femto reagent (Thermofisher Scientific).
